# Supplementary material for: GPR120 is an important inflammatory regulator in the development of osteoarthritis
Source: Springer Nature journal article supplement (doi:10.1186/s13075-018-1660-6), 2018-08-03
Supplement: MOESM1 [file 16000450]

Additional file 1. Primer sequence for mouse genotyping

| Genes            | Forward primer           | Reverse primer           |
|------------------|--------------------------|--------------------------|
| Gpr120           | CGAAAGCATCGCGGAAGAG      | GAGTTGGCAAACGTGAAGGC     |
| Neo <sup>f</sup> | TTCGGCTATGACTGGGCACAACAG | TACTTTCTCGGCAGGAGCAAGGTG |
| Gapdh            | GCCTTCTCCATGGTGGTGAA     | GCACAGTCAAGGCCGAGAAT     |
