# Supplementary material for: GPR120 is an important inflammatory regulator in the development of osteoarthritis
Source: Springer Nature journal article supplement (doi:10.1186/s13075-018-1660-6), 2018-08-03
Supplement: MOESM2 [file 16000450]

Additional file 2. Primer sequence for Quantitative real-time PCR

| Genes                 | Forward primer            | Reverse primer           |
|-----------------------|---------------------------|--------------------------|
| Human<br>CCL2         | GCTCAGCCAGATGCAATCAATG    | GTGTCTGGGGAAAGCTAGGG     |
| Human<br>COX2         | CAAATTGCTGGCAGGGTTGC      | AGGGCTTCAGCATAAAGCGT     |
| Human<br>GAPDH        | AACAGCGACACCCACTCCTC      | CATACCAGGAAATGAGCTTGACAA |
| Human<br>GPR120       | CCAAAATTTTACAGATCACAAAGGC | CACCACCCAGAAGAAGAGGG     |
| Human<br>IL-1 $\beta$ | AAATACCTGTGGCCTTGGGC      | TTTGGGATCTACTCTCCAGCT    |
| Human<br>MMP13        | AAGGAGCATGGCGACTTCT       | TGGCCAGGAGGAAAAGC        |
